# Supplementary material for: Comprehensive genomic characterization of gene therapy-induced T-cell acute lymphoblastic leukemia
Source: PubMed Central journal article supplement (PMC8321895; doi:10.1038/s41375-020-0779-z), 2020-03-03

A

|              | all<br>SNVs | all<br>Indels | functional<br>SNVs | functional<br>Indels | Subclonal<br>SNVs/<br>Indels<br>(MAF<0.3) | Time<br>after GT<br>(days) |
|--------------|-------------|---------------|--------------------|----------------------|-------------------------------------------|----------------------------|
| <b>WAS1</b>  | 870         | 233           | 13                 | 3                    | 19%                                       | 1813                       |
| <b>WAS5</b>  | 1172        | 275           | 6                  | 2                    | 63%                                       | 1073                       |
| <b>WAS6</b>  | 153         | 185           | 1                  | 1                    | (50%)                                     | 483                        |
| <b>WAS7</b>  | 442         | 287           | 5                  | 1                    | 0%                                        | 1105                       |
| <b>WAS8</b>  | 932         | 393           | 11                 | 2                    | 38%                                       | 792                        |
| <b>WAS10</b> | 1509        | 79            | 18                 | 2                    | 20%                                       | 1364                       |

B

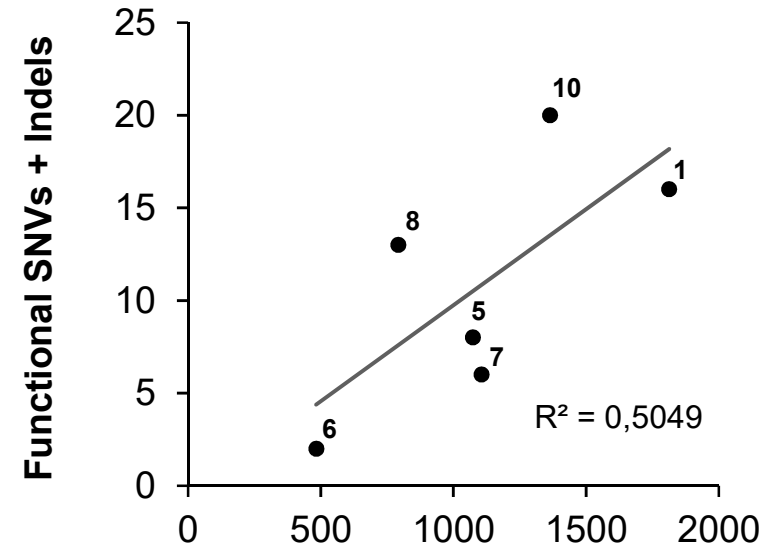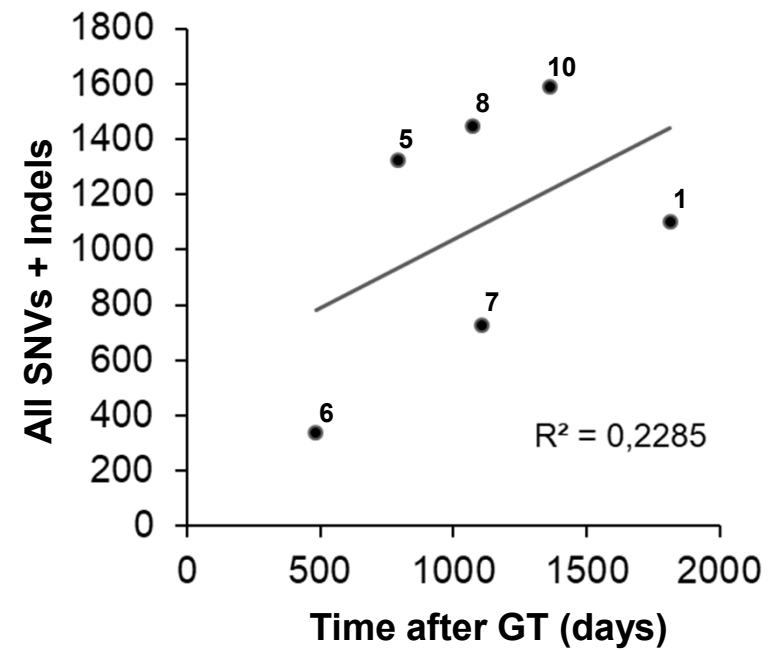

Supplement: 41375_2020_779_MOESM7_ESM.pdf [file 41375_2020_779_MOESM7_ESM.pdf]
