# Supplementary material for: Comprehensive genomic characterization of gene therapy-induced T-cell acute lymphoblastic leukemia
Source: PubMed Central journal article supplement (PMC8321895; doi:10.1038/s41375-020-0779-z), 2020-03-03

A

- AC1 spontaneous deamination
- AC2 APOBEC
- AC3 defect DNA DSB repair hom. recomb.
- AC4 tobacco mutagens, benzo(a)pyrene
- AC5 unknown
- AC10 altered POL E
- AC19 unknown
- AC24 aflatoxin

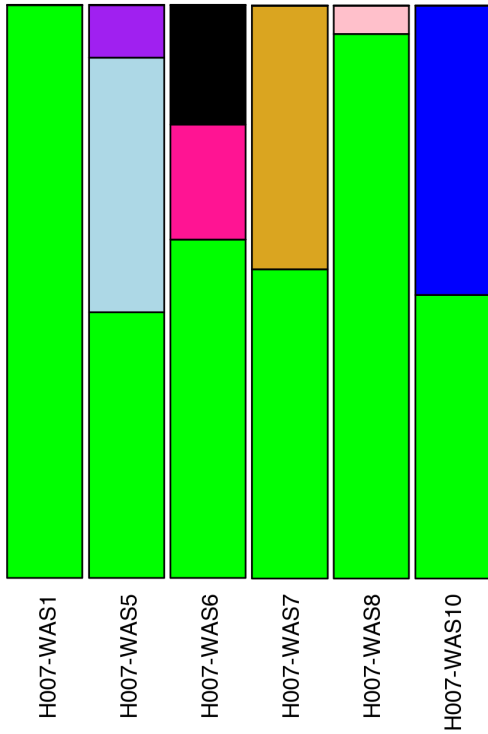

B

- T.1 spontaneous deamination (AC1)
- T.3 defect DNA DSB repair hom. Recomb. (AC3)
- T.4 unknown (AC5)
- T.6 unknown (AC8)
- T.8 unknown (AC18)
- T.9 defect DNA MMR (AC26)

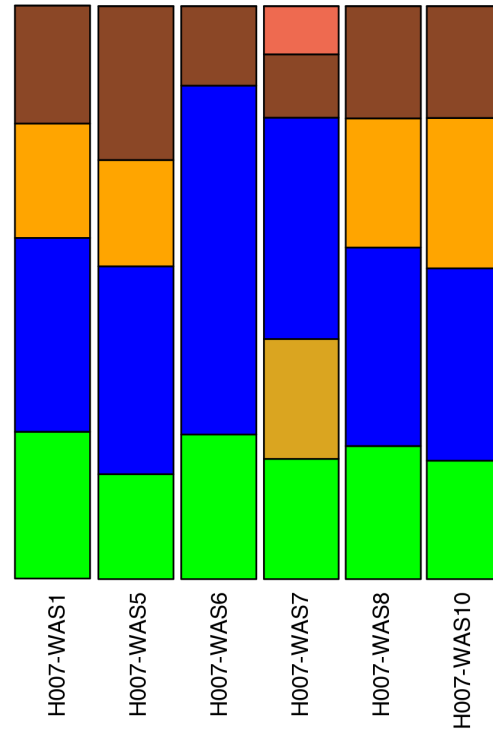

C

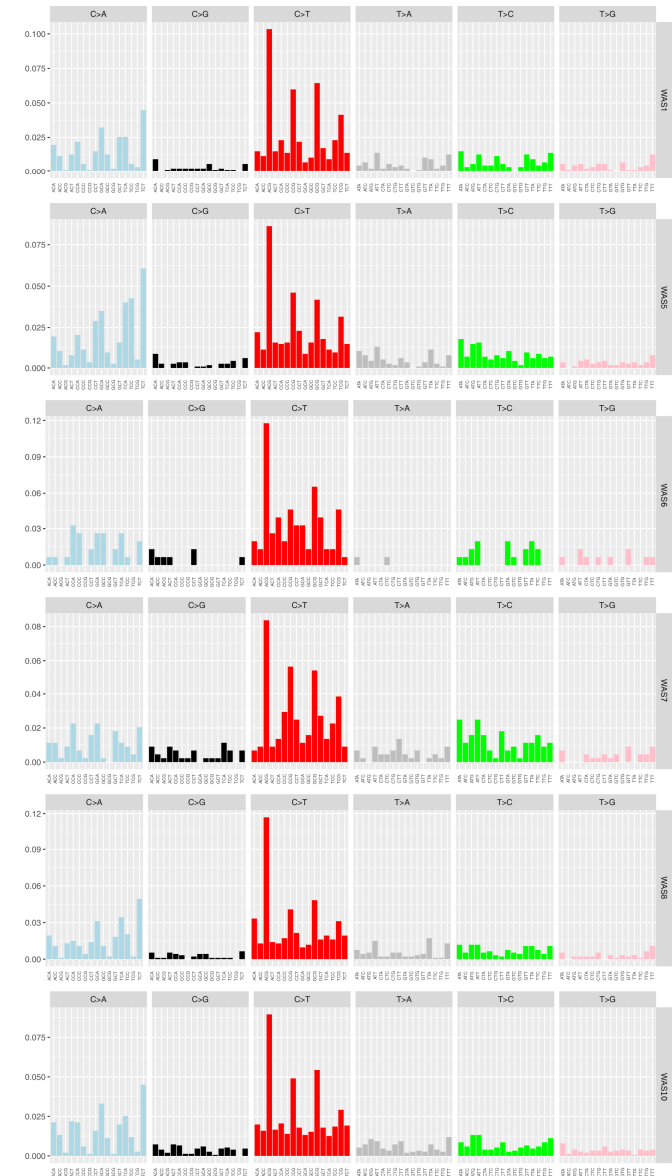

Supplement: 41375_2020_779_MOESM10_ESM.pdf [file 41375_2020_779_MOESM10_ESM.pdf]
